# Supplementary material for: New airborne research facility observes sensitivity of cumulus cloud microphysical properties to aerosol regime over the great barrier reef
Source: Royal Society of Chemistry journal article supplement (doi:10.1039/d4ea00009a), 2024-01-01
Supplement: d4ea00009a1.pdf [file d4ea00009a1.pdf]

***Supplementary material - Introducing a new airborne research facility in Australia: New airborne research facility observes sensitivity of cumulus cloud microphysical properties to aerosol regime over the Great Barrier Reef***

*Diana C. Hernandez-Jaramillo, Christopher Medcraft, Ramon Campos Braga, Peter Butcherine, Adrian Doss, Brendan Kelaher, Daniel Rosenfeld, and Daniel P. Harrison*

## Section S1

### Aircraft instrumentation

Table S1 Instrumentation installed onboard Cessna 337 during the Mar-Apr 2023 Cooling and Shading campaign

| Location                                  | Instrument                        | Manufacturer                     | Model               | Measured quantity                           | Range                        |
|-------------------------------------------|-----------------------------------|----------------------------------|---------------------|---------------------------------------------|------------------------------|
| <b>Aerosol Instrumentation System</b>     |                                   |                                  |                     |                                             |                              |
| Rack in cabin                             | mSEMS                             | Brechtel                         | 9404                | Aerosol Particle Size Distribution (PSD)    | selectable 5 - 375 nm        |
| Rack in cabin                             | aMCPC (SEMS)                      | Brechtel                         | 9403                | Aerosol Particle Size Distribution (PSD)    | 7-2,000 nm                   |
| Rack in cabin                             | MCPC                              | Brechtel                         | 1720                | Particle number concentration               | 7-2,000 nm                   |
| Rack in cabin                             | MCPC (heated)                     | Brechtel                         | 1720                | Inorganic particle number concentration     | 7-2,000 nm                   |
| Underwing pod                             | mOPC                              | Brechtel                         | 9405                | Aerosol Particle Size Distribution (PSD)    | 0.16 – 3 µm                  |
| Underwing pod                             | Isokinetic inlet                  | Airborne Research Australia      | Custom              | Inlet for aerosol particles                 |                              |
| Underwing pod                             | Inlet 3-way valve                 | Brechtel                         | 3V                  | select from sample or air from inside pod   |                              |
| Underwing pod                             | Vacuum pump- Nafion Dryer Circuit | Brechtel                         | N/A                 | Used in nafion drying circuit               |                              |
| Underwing pod                             | Nafion Dryer                      | Permapure                        | MD700               | Dries OPC air sample flow                   |                              |
| Underwing pod                             | Nafion Dryer                      | Permapure                        | MD700               | Dries cabin air sample flow                 |                              |
| Rack in cabin                             | Neutraliser - Soft X-ray          | Brechtel                         | 9002                | aerosol charge neutraliser used with mSEMS  |                              |
| Rack in cabin                             | TAP- Black carbon                 | Brechtel                         | 2901                | light absorption and estimated black carbon | wavelengths 467, 528, 652 nm |
| Rack in cabin                             | Vacuum pump - TAP                 | Thomas                           | 70060071            |                                             |                              |
| Rack in cabin                             | Vacuum pump - MCPC1               | Thomas                           | 70060071            |                                             |                              |
| Rack in cabin                             | Vacuum pump - MCPC2               | Thomas                           | 70060071            |                                             |                              |
| Rack in cabin                             | UHSAS                             | Droplet Measurement Technologies | UHSAS-G             | 0.06-1µm                                    | 60 nm – 1 µm                 |
| Rack in cabin                             | Thermodenuder heater (300 degC)   | Neptech                          | QUEEN-7053-50CM-000 | Pre-treatment for non-volatile CN           |                              |
| <b>Meteorology Instrumentation System</b> |                                   |                                  |                     |                                             |                              |
| Wing                                      | ARIM-200 probe                    | Aventech                         | ARIM-S200           | 3D wind, T, RH, Airspeed                    |                              |
| Wing                                      | ARIM-200 probe Anti-ice           | Aventech                         | ARIM-S201           | 3D wind, T, RH, Airspeed                    |                              |
| Cabin                                     | Vectrax 10 module                 | Aventech                         | AIMMS30             | 3D wind, T, RH, Airspeed                    |                              |
| Cabin                                     | MetTrack display                  | Aventech                         | AIMMS31             | 3D wind, T, RH, Airspeed                    |                              |
| Underwing pod                             | IMU / GPS                         | OXTS                             | XNAV650             | GPS position /Attitude                      |                              |

|                                                  |                                        |                                  |                              |                                        |                                                                  |
|--------------------------------------------------|----------------------------------------|----------------------------------|------------------------------|----------------------------------------|------------------------------------------------------------------|
| Rack in cabin                                    | Hygrometer- power unit                 | Buck Research Instruments        | 1011C                        |                                        |                                                                  |
| Underwing pod                                    | Hygrometer - sensor                    | Buck Research Instruments        | 1011C                        | dew point temperature                  |                                                                  |
| <b>Radiation Instrumentation System</b>          |                                        |                                  |                              |                                        |                                                                  |
| Wing                                             | Net radiometer                         | Apogee                           | Net radiometer SN-500        | Net radiation                          | 385 - 2105 nm (upward-looking), 295 - 2685 nm (downward-looking) |
| Rack in cabin                                    | data logger                            | Campbell scientific              | CR1000X                      | datalogger for radiometer              |                                                                  |
| <b>Cloud Microphysics Instrumentation System</b> |                                        |                                  |                              |                                        |                                                                  |
| Fuselage                                         | camera                                 | Milesight                        | MSC5375PD                    | Video - Upward                         |                                                                  |
| Wing                                             | camera                                 | Milesight                        | MSC5375PD                    | Video - Forward down                   |                                                                  |
| Wing                                             | camera                                 | Milesight                        | MSC5375PD                    | Video - Down                           |                                                                  |
| Underwing pod                                    | camera                                 | Milesight                        | MSC5375PD                    | Video - Forward                        |                                                                  |
| Rack in cabin                                    | camera recorder + 2TB HDD              | HikVision                        | DS-MP5604N                   |                                        |                                                                  |
| Wing                                             | CCP/CIPg                               | Droplet Measurement Technologies | CCP                          | Cloud Particle Size Distribution (PSD) | 15 - 960 $\mu$ m                                                 |
| Wing                                             | CCP/CDP                                | Droplet Measurement Technologies | CCP                          | Cloud Particle Size Distribution (PSD) | 3 - 50 $\mu$ m                                                   |
| Wing                                             | CCP/Hot-wire                           | Droplet Measurement Technologies | CCP                          | Liquid Water Content (LWC)             | 0 - 3 g/m3                                                       |
| Wing                                             | Cloud Combination Probe (CCP) Anti-ice | Droplet Measurement Technologies | CCP                          |                                        |                                                                  |
| <b>Data processing, storage, &amp; Display</b>   |                                        |                                  |                              |                                        |                                                                  |
| Rack in cabin                                    | fanless computer                       | NEXCOM                           | ATC 8110                     | Data acquisition                       |                                                                  |
| Cabin                                            | Rear seat monitor                      | Aplex                            | ARCDISS-115                  | instruments display                    |                                                                  |
| Rack in cabin                                    | Network time server                    | Time Machines Corporation        | TM1000A -GPS NTP time server | GPS based time to nanosecond accuracy  |                                                                  |
| Rack in cabin                                    | Unmanaged Network Switch               | Weidmuller                       | IE-SW-EL10-8GTPOE-2GESFP     |                                        |                                                                  |
| Cabin                                            | Laptop                                 | Dell                             | Lattitude 14                 |                                        |                                                                  |
| <b>Power supply system</b>                       |                                        |                                  |                              |                                        |                                                                  |
| Rack in cabin                                    | Power distribution board               |                                  |                              |                                        |                                                                  |
| Rack in cabin                                    | 240V inverters                         |                                  |                              | Power assumes 95% efficient            |                                                                  |
| Rack in cabin                                    | 28V to 12V Transformer(s)              |                                  |                              | Power assumes 95% efficient            |                                                                  |

## Section S2.

### The strategy of measurements with the research aircraft during the Marine Cloud Brightening campaign

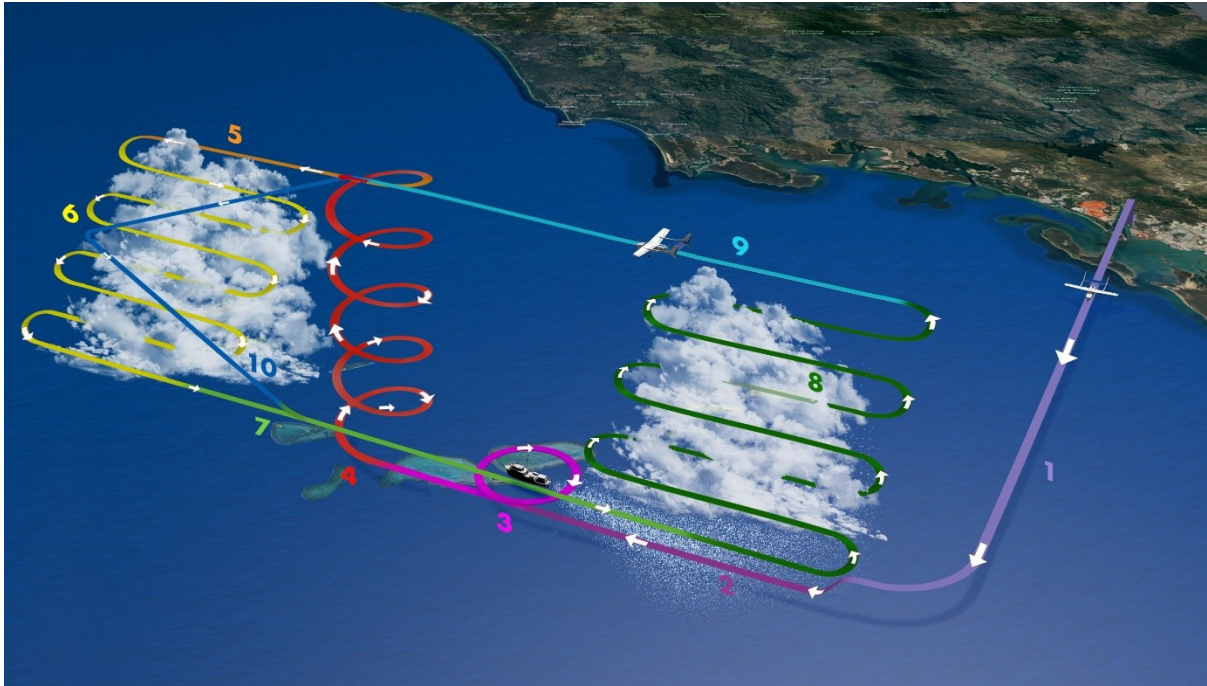

Figure S1. Schematic figure of the flight pattern during MCB campaign.

1. Transfer from the Gladstone airport to the reef: Low-level flight for monitoring aerosols and thermodynamics on the way. (Not higher than 1000 ft).
2. Descend to 300 ft into the plume towards the vessel.
3. Comparison with ship measurements circling twice around it at a low level.
4. Vertical ascending spiral windward of the ship to avoid the sea spray plume. The spiral ascending is performed with a full rate of ascent at a bank angle of  $15^\circ$  to 2000 ft above cloud tops, or 10,000', whatever comes first.
5. Radiation measurements above clouds before descending through cloud tops.
6. Descend by doing cloud cross-sections to establish cloud background ( $\sim 5$  steps, no more than 1000' vertical spacing), including base and below base passes.
7. Fly into the plume downwind of the ship just below the cloud base, finding ingestion to the cloud base.
8. Ascending by doing cloud cross-sections to document seeding signatures from cloud base to top.
9. Radiation measurements above clouds.
10. Descend only through clouds for another case. Not more than -1000 fpm in the cloud.

### Section S3

#### Calculated Cloud Microphysical Properties

*From the DSD measured with CCP-CDP and CCP-CIP, the following cloud microphysical properties were calculated:*

- Number concentration of cloud droplets -  $N_d$  ( $\text{cm}^{-3}$ ):

$$N_d = \int_{1.5\mu m}^{25\mu m} N(r) dr \quad (1)$$

where,  $N$  is the particle concentration in size range of the probe bin, and  $r$  is the particle radius ( $\mu\text{m}$ ).

- Cloud Water Content - CWC ( $\text{g m}^{-3}$ ):

$$CWC = \frac{4\pi}{3} \rho \int_{1.5\mu m}^{25\mu m} r^3 N(r) dr \quad (2)$$

where,  $\rho$  is the particle density. The density of water ( $1 \text{ g cm}^{-3}$ ) is used in calculations since our measurements were performed in temperature above  $0^\circ\text{C}$ .

- Cloud Droplet Effective Radius-  $r_e$  ( $\mu\text{m}$ ):

$$r_e = \frac{\int_{1.5\mu m}^{25\mu m} r^3 N(r) dr}{\int_{1.5\mu m}^{25\mu m} r^2 N(r) dr} \quad (3)$$

- Drizzle Water Content - DWC ( $\text{g m}^{-3}$ ):

$$DWC = \frac{4\pi}{3} \rho \int_{25\mu m}^{125\mu m} r^3 N(r) dr \quad (4)$$

## Section S4

### Type of clouds sampled

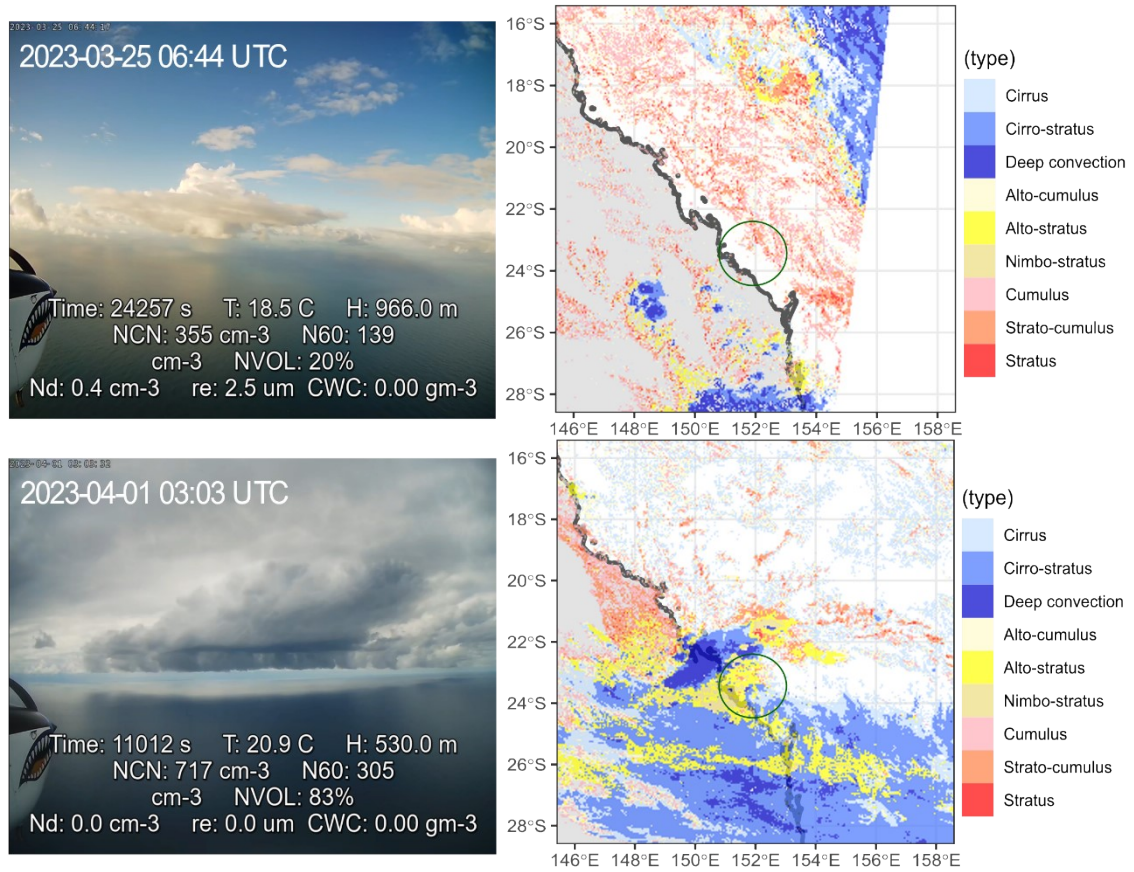

Figure S2 Images captured by the pod camera of the clouds sampled during March 25 and April 01 2023, and cloud-type (The International Satellite Cloud Climatology Project ISCCP) plots derived from Himawari-8 satellite data for the respective flights

## Section S5

### Additional Vertical profile of APSDs

March 25, 2023

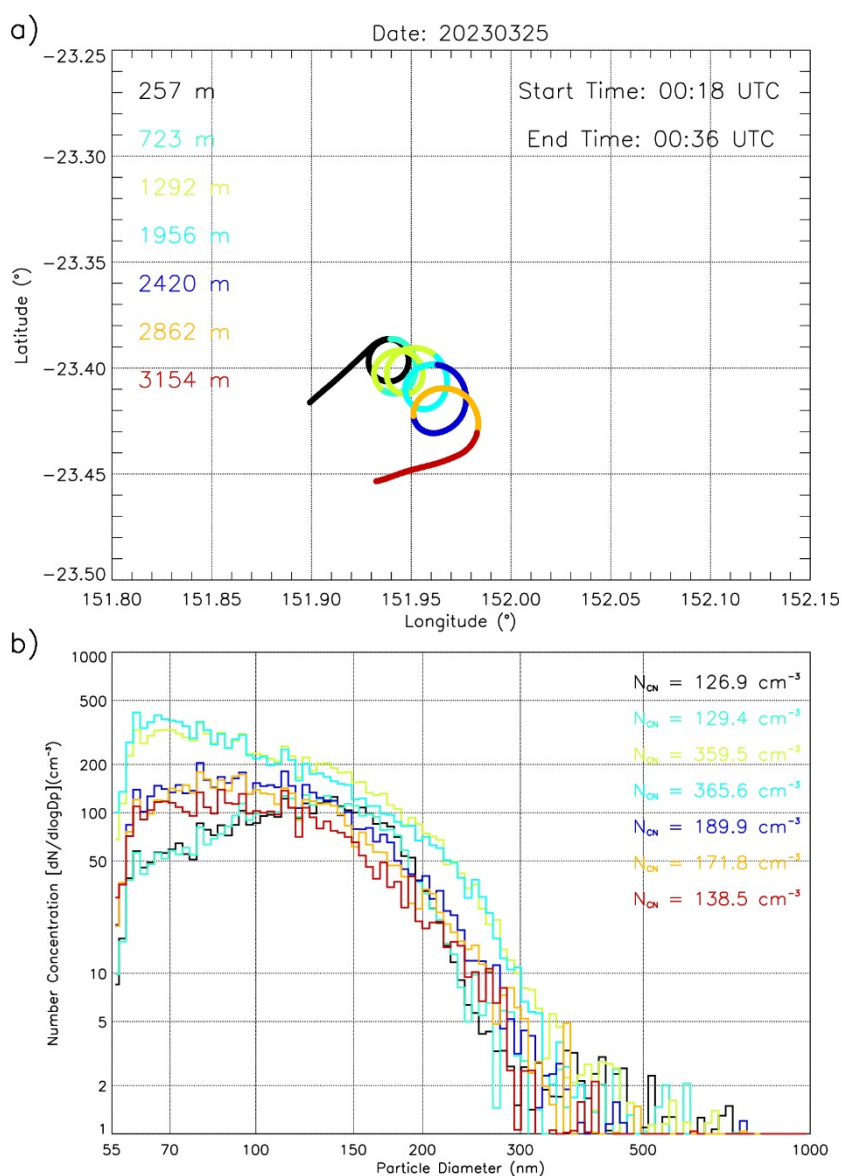

Figure S3 a-b). Aerosol particle size distribution measurements in a vertical ascending spiral on March 25, 2023.

April 01, 2023

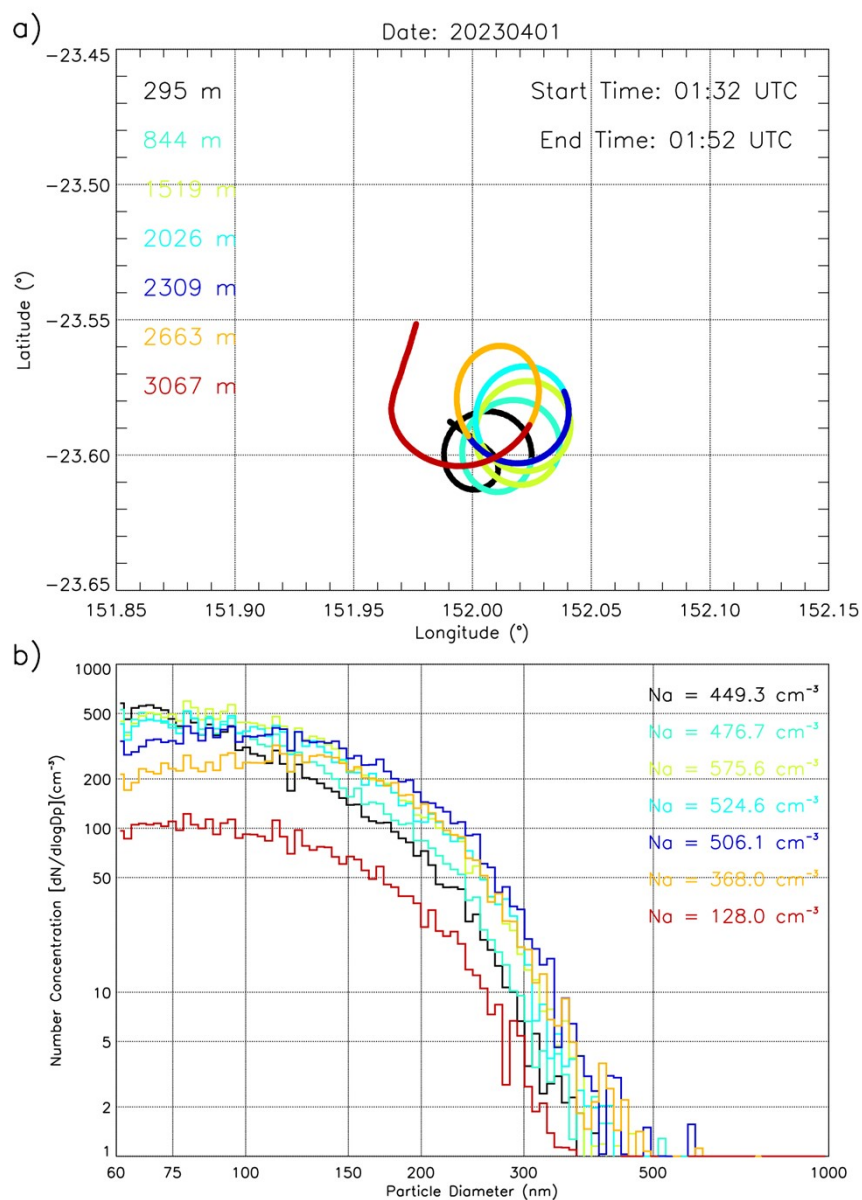

Figure S4 a-b). Aerosol particle size distribution measurements in a vertical ascending spiral on April 01, 2023.

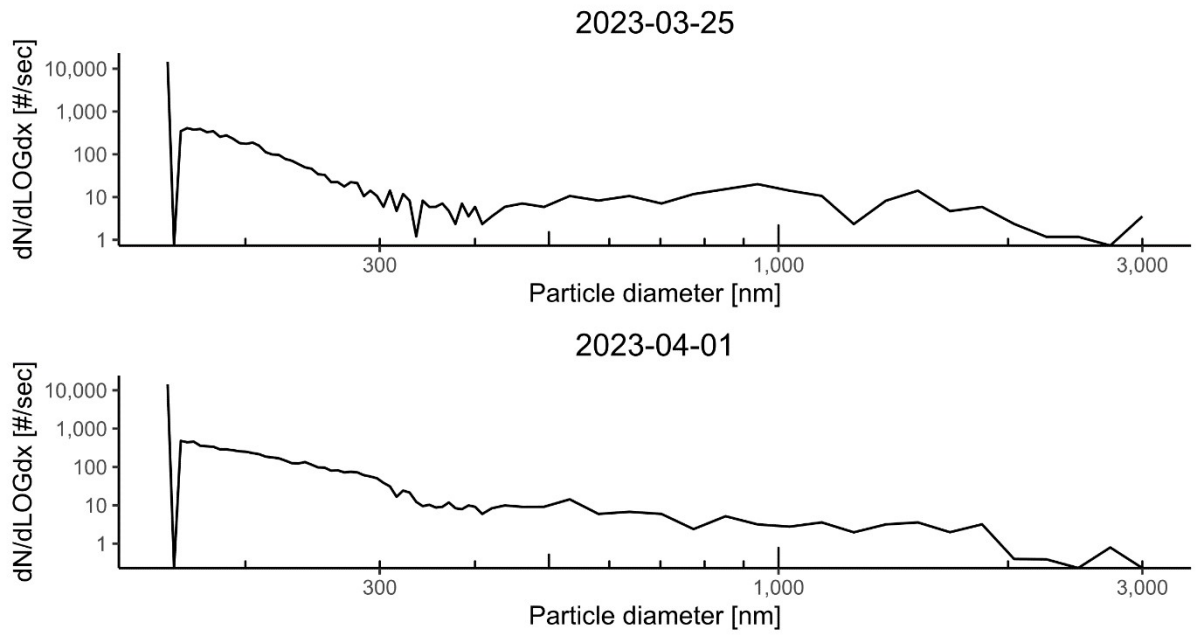

Figure S5 a-b). Aerosol particle size distribution measurements collected at low levels ( $\sim 300$  m) using a miniaturised Optical Particle Counter (9405 mOPC; Brechtel, USA).

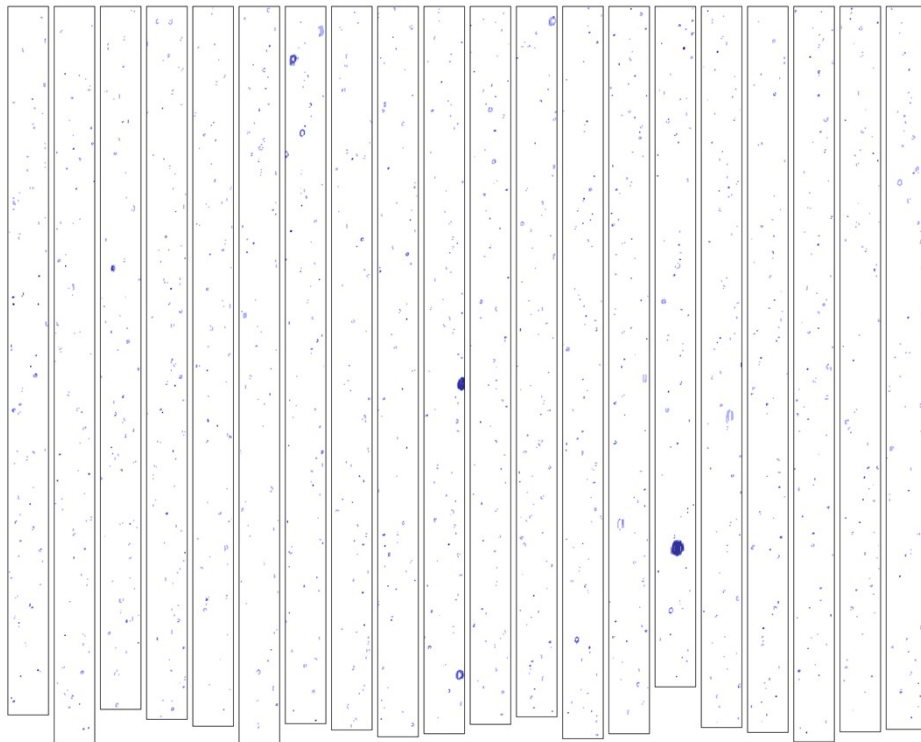

Figure S6. CCP-CIP image correspondent to a cloud pass with  $r_e = 12.4 \mu\text{m}$  at altitude of  $\sim 3000$  m when rain starts ( $DWC > 0.05 \text{ g m}^{-3}$ ) on April 1.

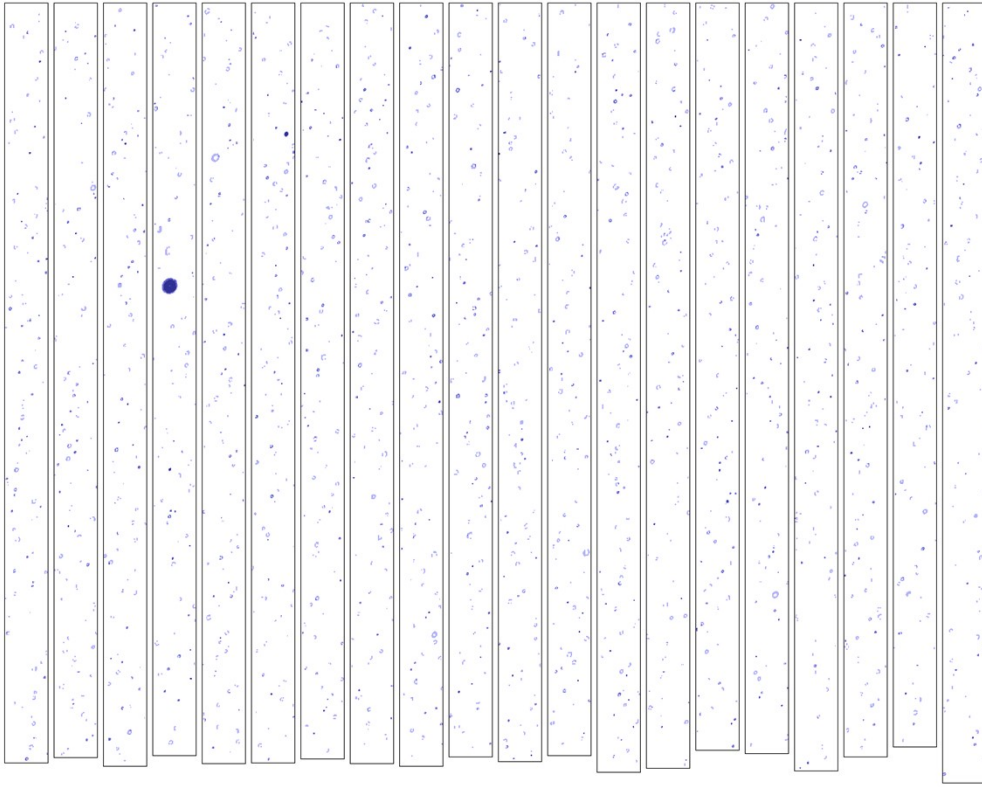

Figure S7. CCP-CIP image correspondent to a cloud pass with  $r_e = 14.3 \mu\text{m}$  at altitude of  $\sim 1800 \text{ m}$  when rain starts ( $DWC > 0.05 \text{ g m}^{-3}$ ) on March 25.
